# Supplementary material for: Winter roosting ecology of tricolored bats (Perimyotis subflavus) in trees and bridges
Source: Oxford University Press journal article supplement (doi:10.1093/jmammal/gyab080), 2021-06-22
Supplement: gyab080_suppl_supplementary_data_s1.docx [file gyab080_suppl_supplementary_data_s1.docx]

**Supplementary Data SD1*.—*** Stand vegetation types reclassified into four broad vegetation types present within the Upper Coastal Plain of South Carolina, November–March 2017–2019. We accessed data on vegetation type from the vegetation database within the Natural Resources Information System framework.

| Reclassified stand vegetation type | Original stand vegetation type |
| --- | --- |
| Bottomland hardwood forest | Blackwater bottomland |
|  | Pine-Bay hardwood swamp |
|  | Muck swamp |
|  | Bottomland hardwood |
| Upland hardwood forest | Hardwood slope |
| Pine forest | Longleaf pine |
|  | Yellow Pine |
| Mixed pine-hardwood forest | Southern mixed hardwood |
|  | Pine-hardwood |
|  | Longleaf pine-scrub oak |
|  | Pine-bay hardwood forest |
|  | Carolina bay |
|  | Udorthents |
